# Supplementary material for: Graft of lacunary Wells–Dawson heteropoly blue on the surface of TiO2 and its photocatalytic activity under visible light
Source: Royal Society of Chemistry journal article supplement (doi:10.1039/b906073a), 2009-01-01
Supplement: b906073a.pdf [file b906073a.pdf]

## Supporting Information

### Graft of lacunary Wells-Dawson heteropoly blue on the surface of TiO<sub>2</sub> and its photocatalytic activity under visible light

Ning Fu,<sup>a,b</sup> Gongxuan Lu<sup>\*,a</sup>

<sup>a</sup>State Key Laboratory for Oxo Synthesis and Selective Oxidation, Lanzhou Institute of Chemical Physics, Chinese Academy of Sciences, Lanzhou, 730000, P. R. China

<sup>b</sup>Graduate Collage of Chinese Academy of Sciences, Beijing, 100049, P. R. China

#### Experimental section

**Materials and synthesis of  $\alpha$ -K<sub>6</sub>P<sub>2</sub>W<sub>18</sub>O<sub>62</sub>·9H<sub>2</sub>O (P<sub>2</sub>W<sub>18</sub>) and  $\alpha$ <sub>2</sub>-K<sub>10</sub>P<sub>2</sub>W<sub>17</sub>O<sub>61</sub>·15H<sub>2</sub>O (P<sub>2</sub>W<sub>17</sub>):** Chloroplatinic acid (H<sub>2</sub>PtCl<sub>6</sub>·6H<sub>2</sub>O), glycerol were of analytical grade and used without further purification. Pt was deposited on the TiO<sub>2</sub> surface by the photo-deposition method,<sup>S1</sup> which was confirmed by TEM and XPS as shown in Fig. S1. As shown in Fig. S1a, the platinum nanoparticles, as the electron sink, are identified as small dark dots on the surface of TiO<sub>2</sub>, which were used for acceleration of HPB formation. The size of particle is in the range of 3~8 nm. Fig. S1b shows the narrow scan of Pt (4f) core level of XPS of Pt (loaded on TiO<sub>2</sub>) synthesized by a photo-deposition method. The spectrum shows a doublet containing a low energy band (4f<sub>7/2</sub>) at 71.1 eV, and a high energy band (4f<sub>5/2</sub>) centered at 74.4 eV, which is 3.3 eV higher than the low-energy

band. The lower-energy band centered at 71.1 eV ( $4f_{7/2}$ ) agrees well with the literature values.<sup>S2</sup> The results confirm that Pt exists mainly in the form of Pt(0).

$\alpha$ -K<sub>6</sub>P<sub>2</sub>W<sub>18</sub>O<sub>62</sub>·9H<sub>2</sub>O (P<sub>2</sub>W<sub>18</sub>) and  $\alpha$ <sub>2</sub>-K<sub>10</sub>P<sub>2</sub>W<sub>17</sub>O<sub>61</sub>·15H<sub>2</sub>O (P<sub>2</sub>W<sub>17</sub>) were prepared according to literature methods<sup>S3</sup> and confirmed by FT-IR spectrum (Fig. S2a and S2b). IR of P<sub>2</sub>W<sub>18</sub> (cm<sup>-1</sup>): 1091 ( $\nu_{as}(P-O_a)$ ), 959 ( $\nu_{as}(W-O_d)$ ), 912 ( $\nu_{as}(W-O_b-W)$ ), 802 ( $\nu_{as}(W-O_c-W)$ ). IR of P<sub>2</sub>W<sub>17</sub> (cm<sup>-1</sup>): 1086, 1052, 1017 ( $\nu_{as}(P-O_a)$ ), 942, 914 ( $\nu_{as}(W=O_d)$ ), 881 ( $\nu_{as}(W-O_b-W)$ ), 801, 727 ( $\nu_{as}(W-O_c-W)$ ). IR peak positions of these heteropoly acids were in agreement with those in the literature.<sup>S4-S6</sup> TG: very low heating rate to avoid overflowing of the material during dehydration; water content  $x = 9$  for P<sub>2</sub>W<sub>18</sub> and 15 for P<sub>2</sub>W<sub>17</sub> calculated according to Fig. S3a and S3b. Anal. Calcd for K<sub>6</sub>P<sub>2</sub>W<sub>18</sub>O<sub>62</sub>: K, 5.09; P, 1.35; W, 71.98. Found: K, 4.98; P, 1.43; W, 71.72. Anal. Calcd for K<sub>10</sub>P<sub>2</sub>W<sub>17</sub>O<sub>61</sub>: K, 8.56; P, 1.36; W, 68.64. Found: K, 8.37; P, 1.28; W, 69.01 (dried to constant weight at 400 °C. According to result of TG/DTG/DTA, decomposition temperature of P<sub>2</sub>W<sub>18</sub> is 580 °C and P<sub>2</sub>W<sub>17</sub> is 508 °C).

***Photocatalytic experiments and photoelectrochemical measurements:***

Photocatalytic experiments were performed in a Pyrex cell (ca. 140 cm<sup>3</sup>) having a flat window ca. 10.2 cm<sup>2</sup> for irradiation. The cell was sealed with a silicone rubber septum. A 250 W high pressure Hg lamp and a 300

W halogen lamp were used as the UV-light source and the visible light source for photocatalytic reaction, respectively. The visible light source was equipped with a cut-off filter (Toshiba Y 44.2,  $\lambda > 420$  nm) to remove radiation below 420 nm and to ensure irradiation by visible light only. The term quantum efficiency was measured using a 450 W xenon light source with band pass filters of different wavelengths and calculated as follows: term quantum efficiency (%) =  $(2 \times \text{no. of photo-generated H}_2 / \text{total no. of absorbed photons}) \times 100$ .

Typically, 50 mg of 0.5 wt % Pt/TiO<sub>2</sub> photocatalyst and amount of HPA were suspended in 80 mL 10 (v/v) % glycerol aqueous solutions by a magnetic stirrer. Glycerol was employed as the electron donor. Argon gas was bubbled through the reaction mixture for 40 min to remove oxygen and the suspension of the catalyst was achieved by ultrasonic prior to irradiation. HPB was obtained under UV light irradiation at room temperature, then the UV light was turned off and the reaction was continued under visible light irradiation or in the dark. The H<sub>2</sub> evolved by reduction of water with reduced HPA have been deducted.

P<sub>2</sub>W<sub>17</sub> or P<sub>2</sub>W<sub>18</sub> adsorption onto TiO<sub>2</sub> is completed in 10 min at controlled pH value by ultrasonic mixing without template and precursor. Photoelectrochemical characterization of the samples was performed using a three-electrode configuration with P<sub>2</sub>W<sub>17</sub>-Pt/TiO<sub>2</sub> as the working photo-electrode, saturated calomel electrode (SCE) as a reference

electrode, and platinum foil as a counter electrode. The photocatalyst films on ITO glad slide used as the working electrode were prepared using the dip-coating method.  $\text{TiO}_2$  suspensions were first deposited onto the surface of ITO with a microsyringe and allowed to dry under infrared lamp irradiation. Then the ITO coated with  $\text{TiO}_2$  was immersed in  $\text{P}_2\text{W}_{17}$  solution ( $1\text{ mg mL}^{-1}$   $\text{P}_2\text{W}_{17}$  aqueous solution, pH 8.0). Finally, the re-dried film was cut into pieces to ensure that identical films were used. The thickness of the film was controlled to  $0.5\sim 0.8\ \mu\text{m}$ . The surface of semiconductor working electrode exposed to the electrolyte was circular-film with a geometrical surface area of  $1.6\ \text{cm}^2$ . Glycerol-water solution (10 (v/v)% in  $0.1\ \text{mol L}^{-1}$   $\text{Na}_2\text{SO}_4$ ) was used as the supporting electrolyte. Argon gas was bubbled through the supporting electrolyte for 40 min to remove oxygen. All photoelectrochemical measurements were carried out using a standard three-electrode system equipped with a quartz window as shown in Fig. S4. A 200 W high-pressure mercury-lamp was used as UV-light source. After HPB was generated by UV irradiation, UV light was cut off with a 420 nm cutoff filter in order to act as visible light source.

Since the  $\text{P}_2\text{W}_{17}$  is stable at higher pH range (6.0~8.4) while  $\text{P}_2\text{W}_{18}$  is stable at lower pH range (1.0~5.0),<sup>S7,S8</sup> the experiments were performed at pH 8.0 and pH 3.0 for  $\text{P}_2\text{W}_{17}$  and  $\text{P}_2\text{W}_{18}$ , respectively.

***Instruments and apparatus:*** Fourier transform infrared (FT-IR) spectra

were recorded on an IFS120 HRFTIR spectrophotometer using KBr pellets. The thermogravimetry (TG/DTG/DTA) measurements were made with a PE Pyris Diamond thermal analyzer. The transmission electron microscopy (TEM) images were obtained in a JEM-1200EX TEM. The X-ray photoelectron spectroscopy (XPS) spectra were recorded in a VG ESCALAB 210 electron spectrometer using Mg K $\alpha$  radiation, and binding energies were calculated with respect to C(1s) at 285.00 eV. The pH measurements were performed using a Markson 6200 model pH meter. Ultraviolet-visible spectra were recorded using a HP 8453 spectrophotometer. The produced hydrogen was analyzed on a GC8800-model gas chromatography (TCD, Ar as the carrier, a zeolite 13X column). The incident photon flux was determined with a Ray virtual radiation actinometer (FU 100, sensitivity: 10~50  $\mu\text{V}$   $\mu\text{mol}^{-1}\text{m}^{-2}\text{s}^{-1}$ ). A CHI 660A electrochemistry workstation (CH Instruments, Shanghai, China) and a standard three-electrode system were employed for photoelectrochemical measurements.

## References:

- S1 R. Abe, K. Sayama and H. Arakawa, *Chem. Phys. Lett.*, 2002, **362**, 441-444.
- S2 S. Hufner and G.K. Wertheim., *Phys. Rev. B*, 1975, **11**, 678-683.
- S3 R. Contant, W. G. Klemperer and O. Yaghi, *Inorg. Synth.*, 1990, **27**, 104-111.
- S4 R. G. Finke, M. W. Droege and P. J. Domaille, *Inorg. Chem.*, 1987, **26**, 3886-3896.
- S5 J. Niu, J. Zhao, D. Guo and J. Wang, *J. Mol. Struct.*, 2004, **692**, 223-229.
- S6 Y. Sakai, A. Shinohara, K. Hayashi and K. Nomiya, *Eur. J. Inorg. Chem.*, 2006, **2006**, 163-171.
- S7 R. Contant, M. Richet, Y. W. Lu, B. Keita and L. Nadjo, *Eur. J. Inorg. Chem.*, 2002, **2002**, 2587-2593.
- S8 L. E. Briand, G. T. Baronetti and H. J. Thomas, *Appl. Catal., A*, 2003, **256**, 37-50.

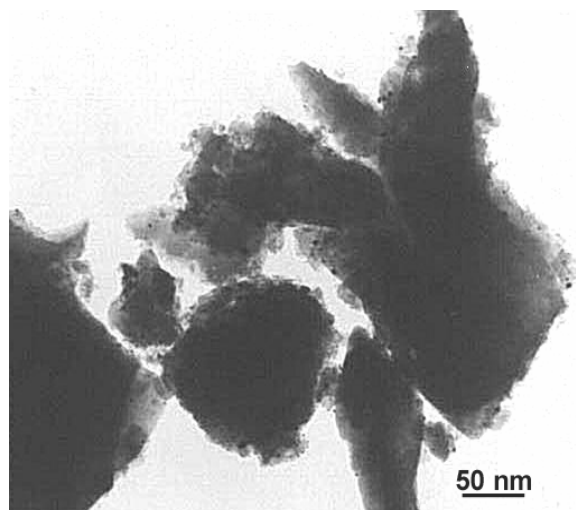

**Figure S1a.**

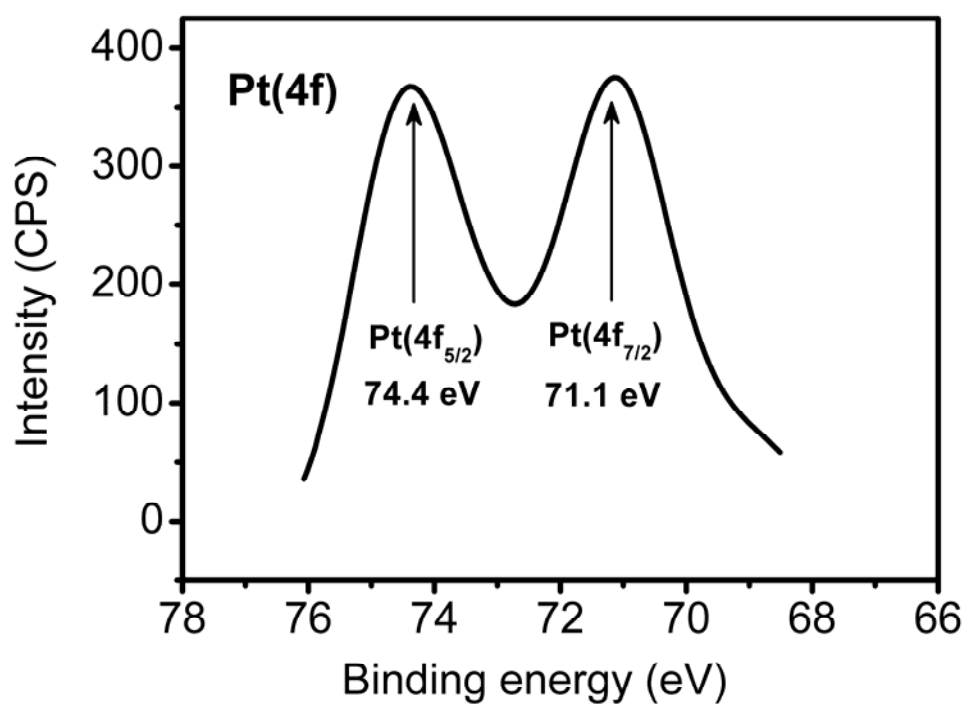

**Figure S1b.**

**Figure S1a.** Transmission electron microscopy (TEM) image of Pt-loaded TiO<sub>2</sub>. **S1b.** Pt (4f) X-ray photoelectron spectroscopy (XPS) spectrum of Pt loaded on TiO<sub>2</sub>.

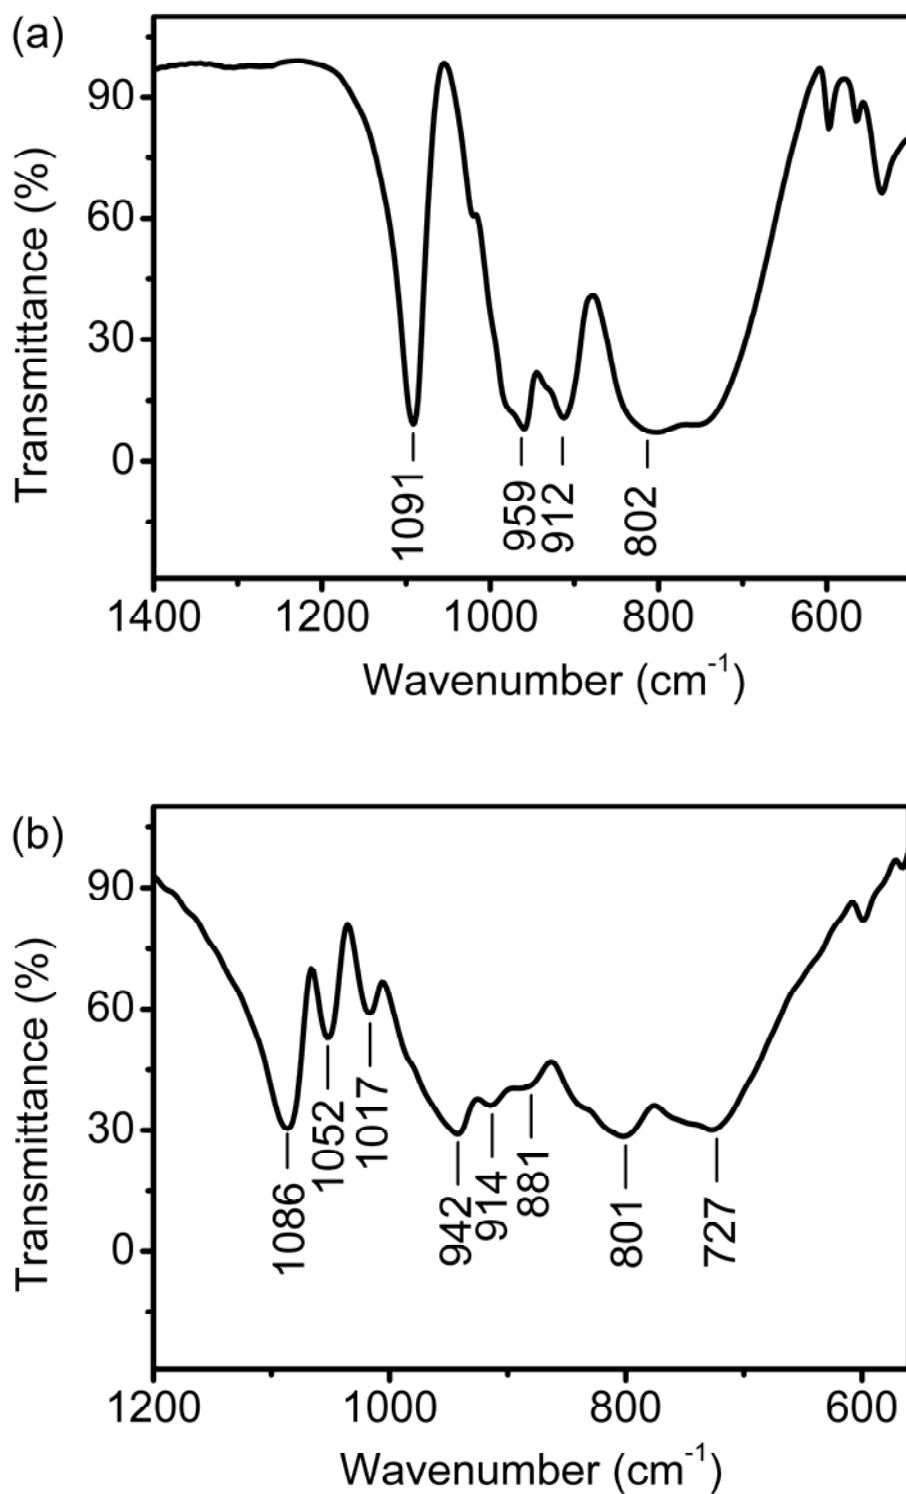

**Figure S2.** IR spectra of  $\alpha$ -K<sub>6</sub>P<sub>2</sub>W<sub>18</sub>O<sub>62</sub>·9H<sub>2</sub>O (a) and  $\alpha_2$ -K<sub>10</sub>P<sub>2</sub>W<sub>17</sub>O<sub>61</sub>·15H<sub>2</sub>O (b).



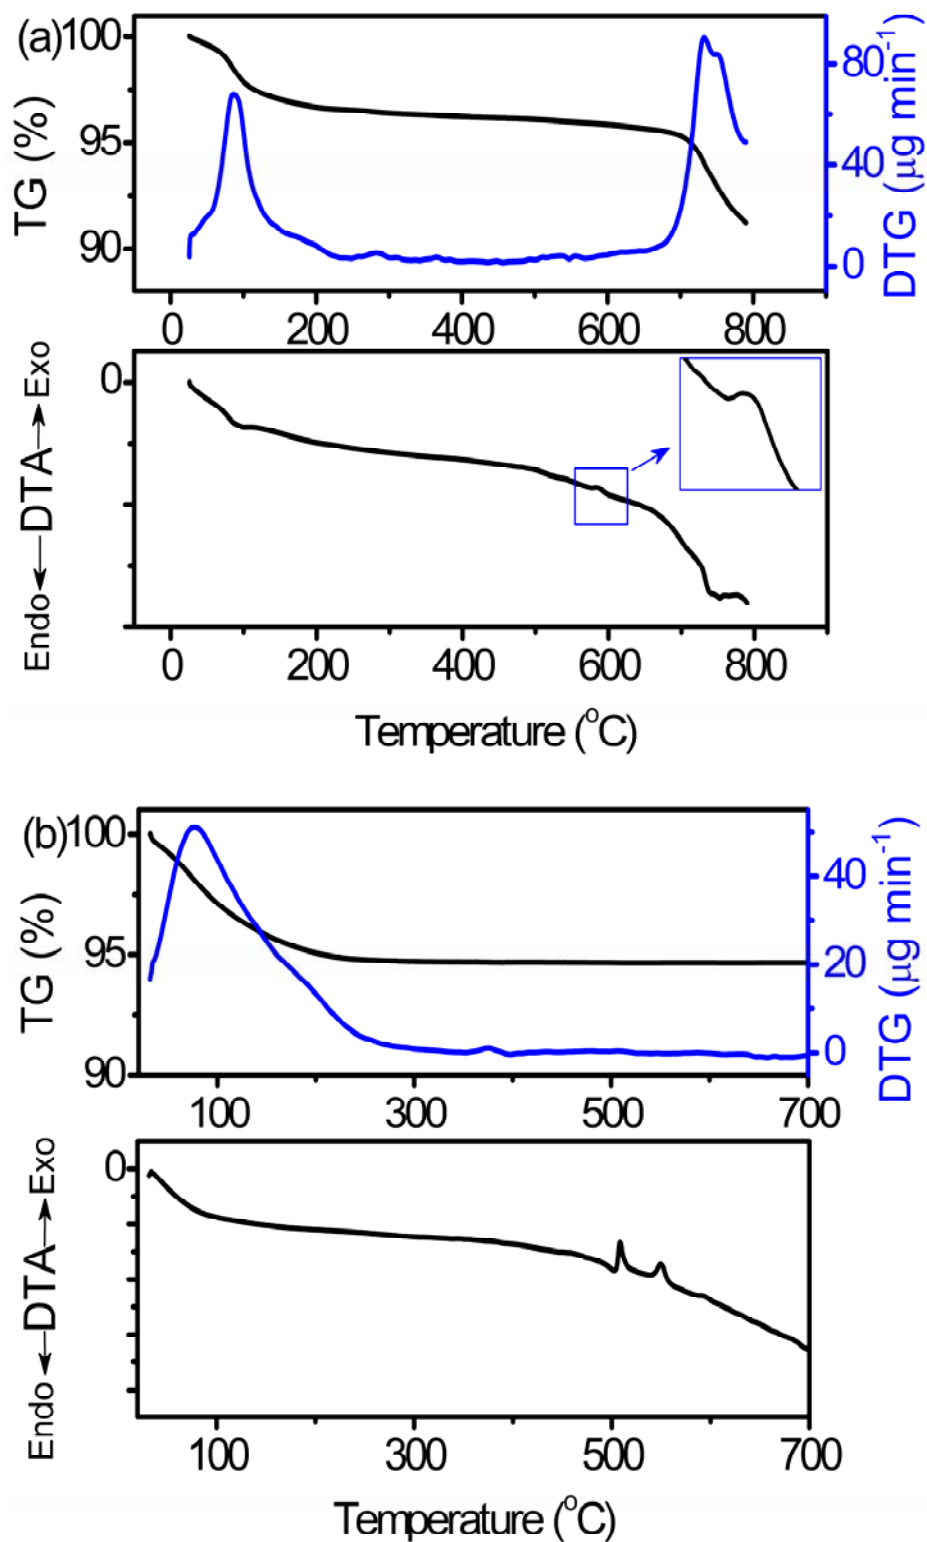

**Figure S3.** TG/DTG/DTA of  $\alpha\text{-K}_6\text{P}_2\text{W}_{18}\text{O}_{62}\cdot 9\text{H}_2\text{O}$  (a) and  $\alpha_2\text{-K}_{10}\text{P}_2\text{W}_{17}\text{O}_{61}\cdot 15\text{H}_2\text{O}$  (b).

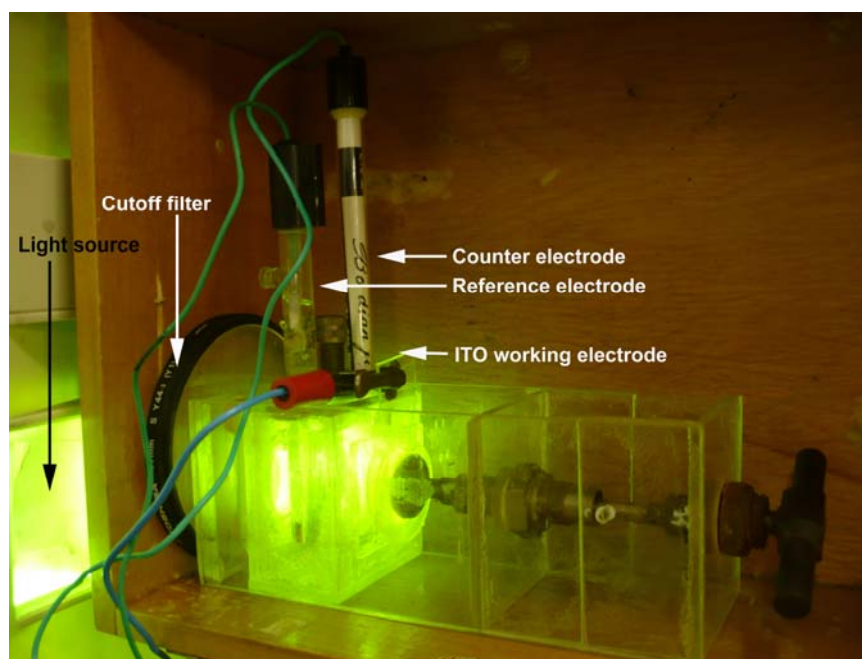

**Figure S4.** Picture of the photo-electrochemical cell

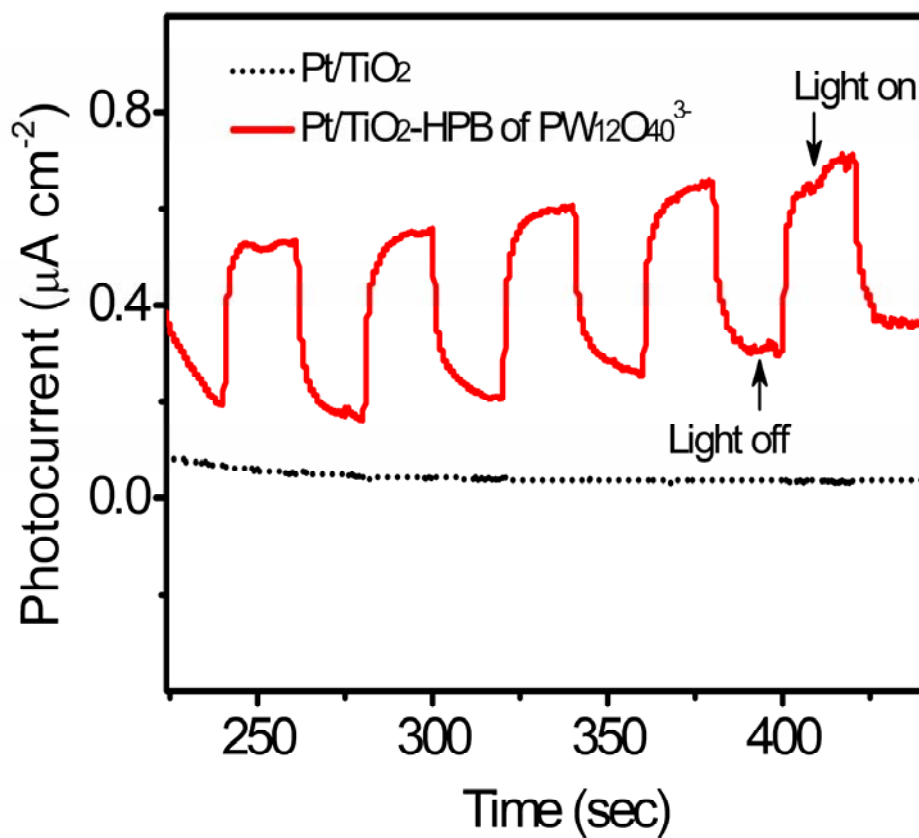

**Figure S5** Unbiased potential photocurrents response of Pt/TiO<sub>2</sub> and Pt/TiO<sub>2</sub>-HPB of PW<sub>12</sub>O<sub>40</sub><sup>3-</sup> ITO electrode under intermittent irradiation ( $\lambda > 420$  nm) in 0.1 M Na<sub>2</sub>SO<sub>4</sub> 10 (v/v) % glycerol aqueous solution.

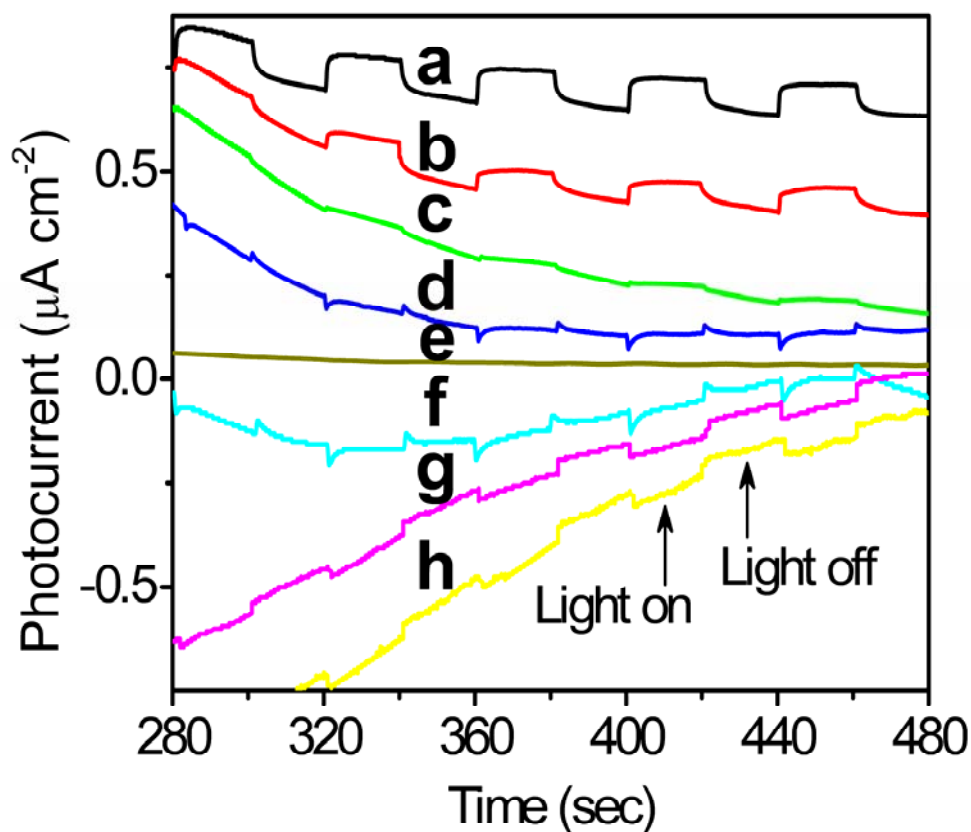

**Figure S6.** Photocurrent response of Pt/TiO<sub>2</sub>-HPB-18 ITO electrode under intermittent irradiation ( $\lambda > 420$  nm) with different potentials in 0.1 M Na<sub>2</sub>SO<sub>4</sub> 10 (v/v) % glycerol aqueous solution. The applied bias potentials: (a) 0.5 V, (b) 0.4 V, (c) 0.2 V, (d) 0 V, (f) -0.2 V, (g) -0.4 V, (h) -0.6 V. (e) represents the photocurrent response of Pt/TiO<sub>2</sub> ITO electrode under unbiased potential.

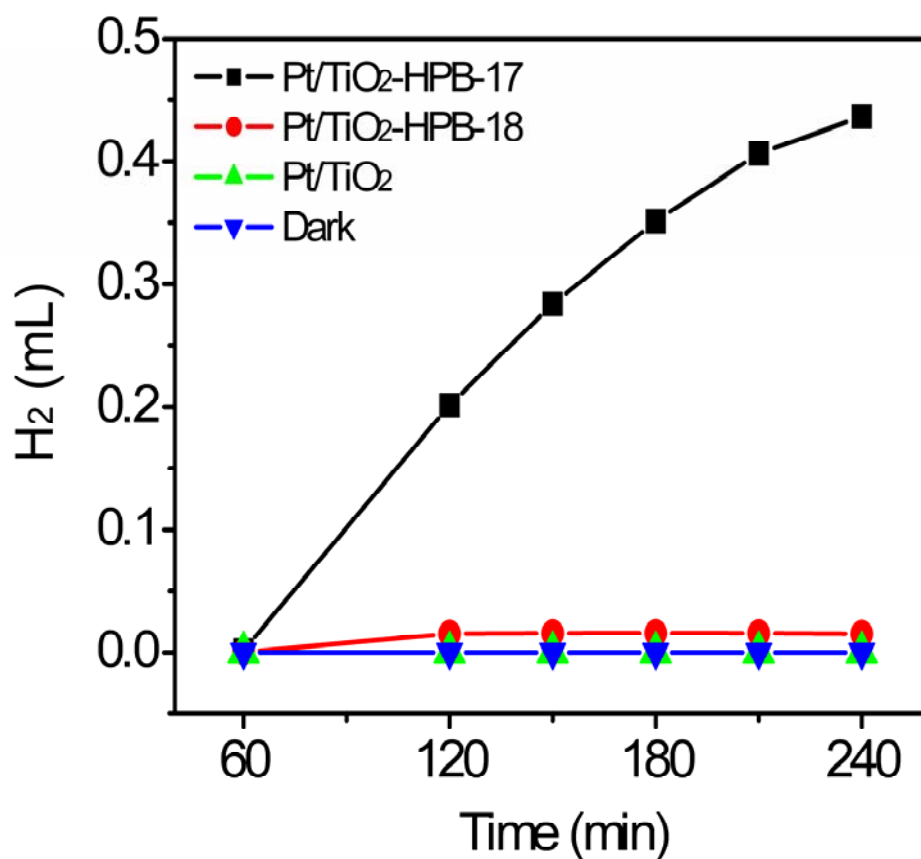

**Figure S7.** Time course of H<sub>2</sub> evolution over Pt/TiO<sub>2</sub>-HPB-17, Pt/TiO<sub>2</sub>-HPB-18 and Pt/TiO<sub>2</sub> catalysts under visible light irradiation. The “Dark” means the reactions of these catalysts were carried out in the dark. Reaction conditions:  $\lambda > 420$  nm, 66  $\mu$ M P<sub>2</sub>W<sub>17</sub> or P<sub>2</sub>W<sub>18</sub>.

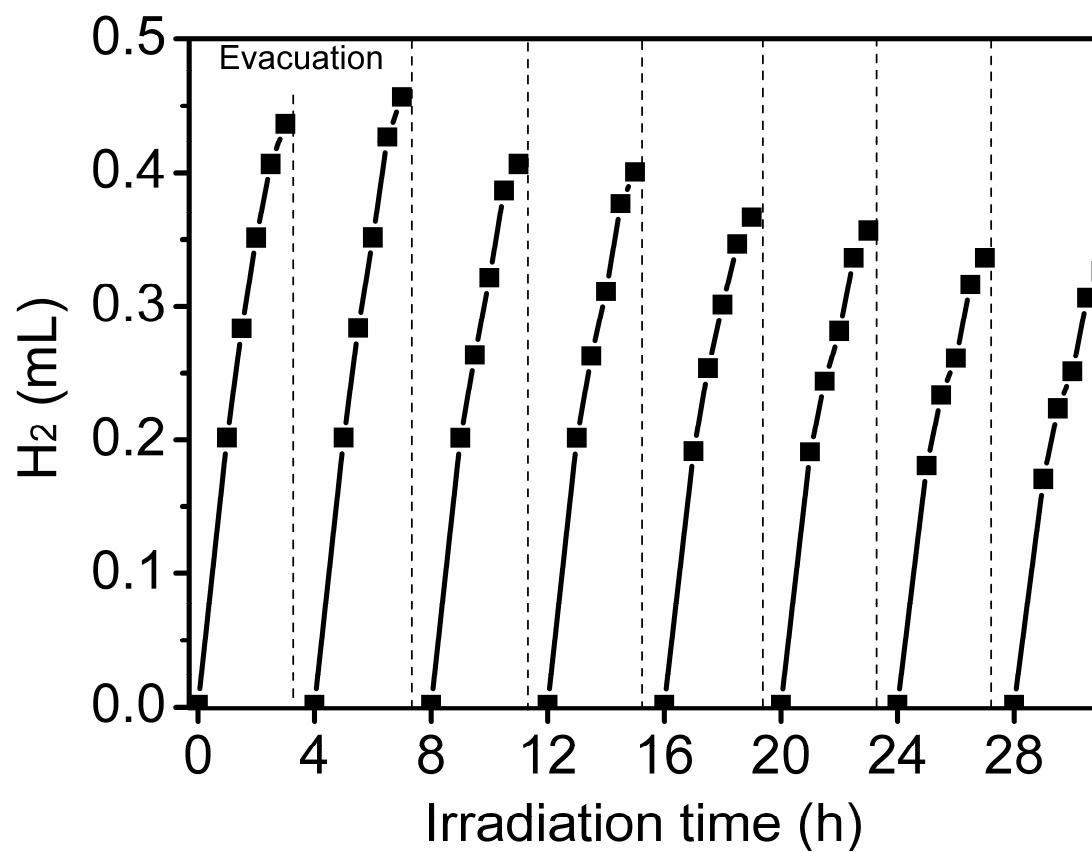

**Figure S8.** Stability of Pt/TiO<sub>2</sub>-HPB-17 catalyst. Reaction conditions:

$\lambda > 420$  nm, 66  $\mu$ M P<sub>2</sub>W<sub>17</sub>.

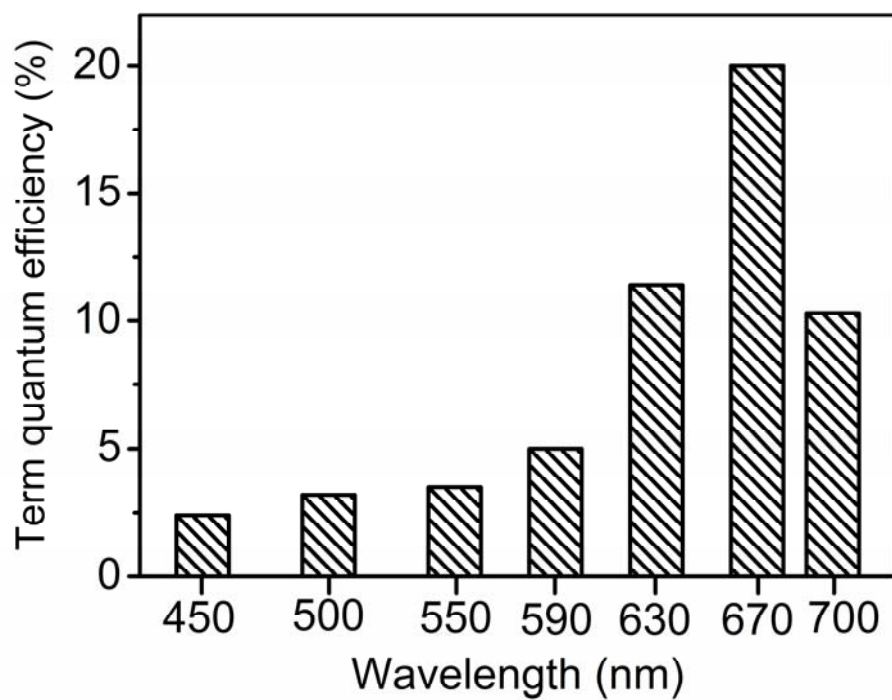

**Figure S9.** Term quantum efficiency of Pt/TiO<sub>2</sub>-HPB-17 in 10 (v/v)% glycerol aqueous solution upon visible light irradiation at different wavelengths. Reaction conditions: 66  $\mu$ M P<sub>2</sub>W<sub>17</sub>.

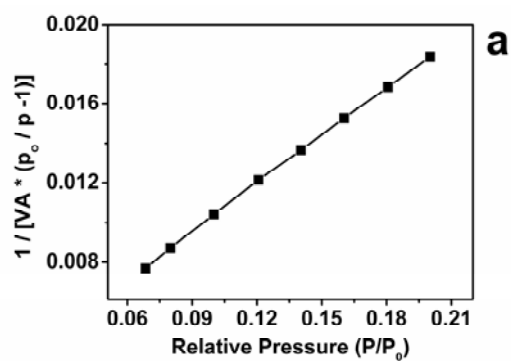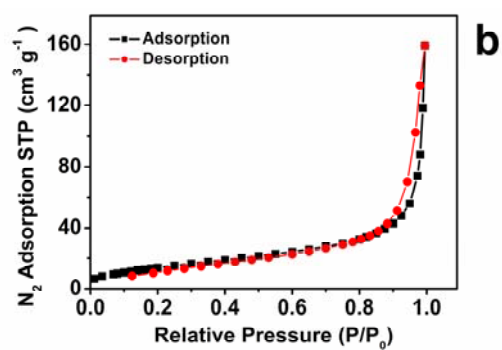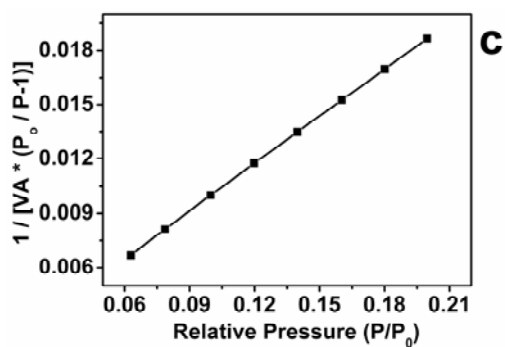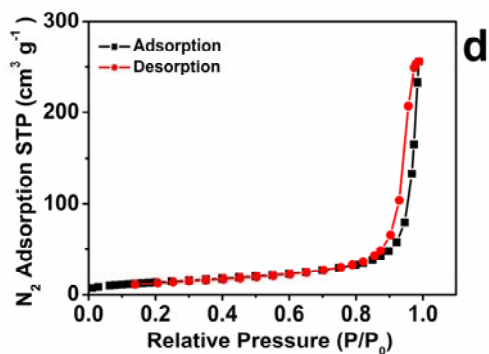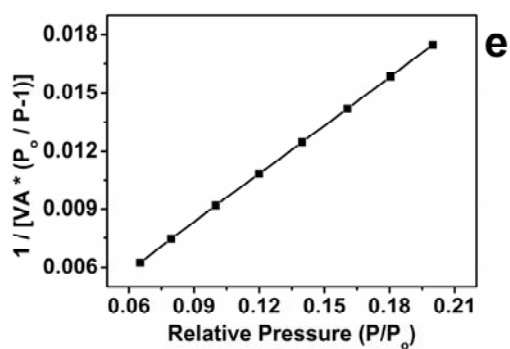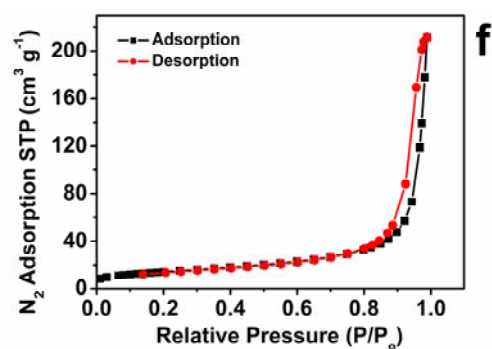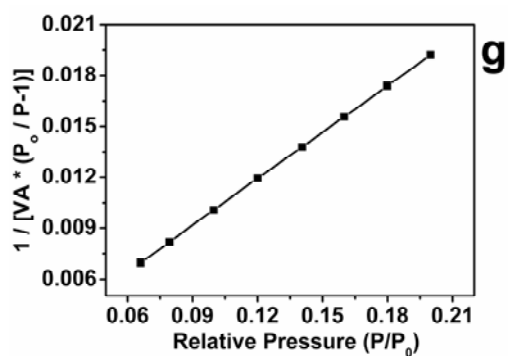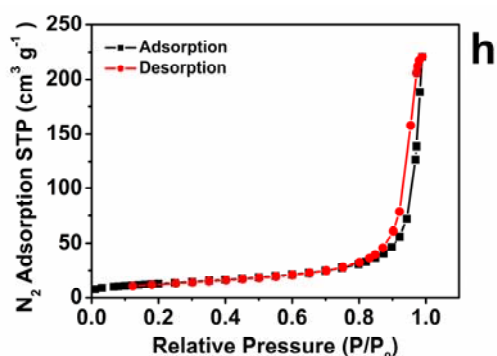



**Figure S10.** BET surface area plot and N<sub>2</sub> adsorption/desorption isotherms of P25 (a, b); Pt/TiO<sub>2</sub> (c, d); Pt/TiO<sub>2</sub>-HPB-17(e, f); Pt/TiO<sub>2</sub>-HPB-18 (g, h).

| Photocatalyst               | Surface area (m <sup>2</sup> /g) |
|-----------------------------|----------------------------------|
| P25 TiO <sub>2</sub>        | 60                               |
| Pt/TiO <sub>2</sub>         | 49                               |
| Pt/TiO <sub>2</sub> -HPB-17 | 52                               |
| Pt/TiO <sub>2</sub> -HPB-18 | 47                               |

The BET results show that surface area of catalysts is not the main role for the difference between photocatalytic activity of Pt/TiO<sub>2</sub>-HPB-17 and Pt/TiO<sub>2</sub>-HPB-18.

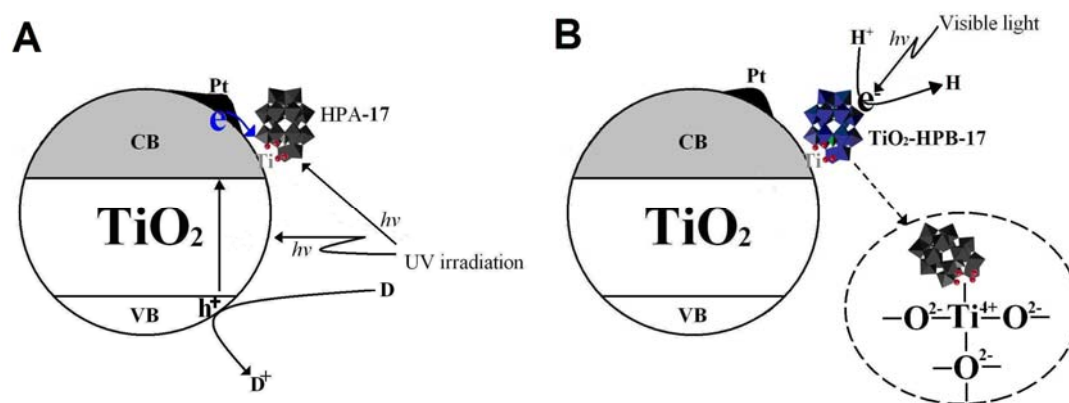

**Scheme S1.** Schematic diagrams of hydrogen evolution.

A and B are schematic diagrams of the current report, in which the HPB-17 was connected with surface of  $\text{TiO}_2$  by coordinate bond due to its lacunary structure and formed “surface complex”. In scheme D, Pt/ $\text{TiO}_2$ -HPB-17 can reduce  $\text{H}^+$  directly under the visible-light irradiation without electron transfer from excited HPB to CB of  $\text{TiO}_2$ , and Pt/ $\text{TiO}_2$ -HPB-17 returns to the ground-state Pt/ $\text{TiO}_2$ -HPA-17 after reduction of  $\text{H}^+$ .

**Table S1:** Peak-Fitting results of W4f XP spectra of samples

| <b>Catalyst</b>                                    | <b>Emission source</b>                    | <b>Binding energy (eV)</b> | <b>Percentage (%)</b> |
|----------------------------------------------------|-------------------------------------------|----------------------------|-----------------------|
| <b>P<sub>2</sub>W<sub>18</sub></b>                 | <b>W4f<sub>5/2</sub> (W<sup>VI</sup>)</b> | <b>38.3</b>                | <b>38</b>             |
|                                                    | <b>W4f<sub>7/2</sub> (W<sup>VI</sup>)</b> | <b>36.2</b>                | <b>62</b>             |
| <b>TiO<sub>2</sub>-P<sub>2</sub>W<sub>18</sub></b> | <b>W4f<sub>5/2</sub> (W<sup>VI</sup>)</b> | <b>38.1</b>                | <b>44</b>             |
|                                                    | <b>W4f<sub>5/2</sub> (W<sup>V</sup>)</b>  | <b>37.3</b>                | <b>15</b>             |
|                                                    | <b>W4f<sub>7/2</sub> (W<sup>VI</sup>)</b> | <b>36.1</b>                | <b>24</b>             |
|                                                    | <b>W4f<sub>7/2</sub> (W<sup>V</sup>)</b>  | <b>35.3</b>                | <b>17</b>             |
| <b>P<sub>2</sub>W<sub>17</sub></b>                 | <b>W4f<sub>5/2</sub> (W<sup>VI</sup>)</b> | <b>38.0</b>                | <b>42</b>             |
|                                                    | <b>W4f<sub>7/2</sub> (W<sup>VI</sup>)</b> | <b>35.9</b>                | <b>58</b>             |
| <b>TiO<sub>2</sub>-P<sub>2</sub>W<sub>17</sub></b> | <b>W4f<sub>5/2</sub> (W<sup>VI</sup>)</b> | <b>38.1</b>                | <b>30</b>             |
|                                                    | <b>W4f<sub>5/2</sub> (W<sup>V</sup>)</b>  | <b>37.3</b>                | <b>19</b>             |
|                                                    | <b>W4f<sub>7/2</sub> (W<sup>VI</sup>)</b> | <b>36.0</b>                | <b>23</b>             |
|                                                    | <b>W4f<sub>7/2</sub> (W<sup>V</sup>)</b>  | <b>35.3</b>                | <b>28</b>             |
